# Supplementary material
Source: publisher figshare collection journal article supplement (https://acs.figshare.com/ndownloader/files/4168072)
Supplement: Supplementary file 1 [file 4168072]

## The effect of the attachment of a penetration accelerating sequence and the influence of hydrophobicity on octaarginine-mediated intracellular delivery

Kentaro Takayama, Hisaaki Hirose, Gen Tanaka, Sílvia Pujals, Sayaka Katayama, Ikuhiko Nakase, Shiroh Futaki\*

### Supporting Information

#### *Peptide synthesis*

All of the peptides used were chemically synthesized by Fmoc (9-fluorenylmethyloxycarbonyl) solid-phase peptide synthesis on a Rink amide resin as already reported.<sup>16</sup> Deprotection of the peptide and cleavage from the resin were conducted by treatment with a trifluoroacetic acid/ethanedithiol mixture (95:5) at room temperature for 3 h followed by reverse-phase high performance liquid chromatography (RP-HPLC) purification. Fluorescent labeling of the peptides was conducted by treatment with Alexa 488 C<sub>5</sub> maleimide sodium salt (Invitrogen) in a dimethylformamide (DMF)/methanol mixture (1:1) for 1.5 h followed by HPLC purification. For the preparation of the PEG5000-PasΔPKR8, PEG10000-PasΔPKR8, and PEG30000-PasΔPKR8 conjugates, Alexa-labeled PasΔPKR8 peptides were treated with bis(sulfosuccinimidyl)suberate (BS<sup>3</sup>) cross-linker (Pierce) as previously reported<sup>23</sup> and conjugated to propylamine-functionalized polyethylene glycols (amino-PEGs, NOF). The structure of the products was confirmed by matrix-assisted laser desorption ionization time-of-flight mass spectrometry (MALDI-TOFMS). Actual sequences of the synthesized peptides are as follows (*italics*: D-amino acids): R8, RRRRRRRRGC-amide; PasR8, FFLIPKGRRRRRRRRGC-amide; F4R8(Alexa), FFFFGRRRRRRRRGC-amide; R8(Alexa), RRRRRRRRGC(Alexa)-amide; PasR8(Alexa), FFLIPKGRRRRRRRRGC(Alexa)-amide; LILIR8(Alexa), LILIGRRRRRRRGC(Alexa)-amide; F2R8, FFGRRRRRRRRGC(Alexa)-amide; F4R8(Alexa), FFFFGRRRRRRRRGC(Alexa)-amide; F6R8(Alexa),

FFFFFGRRRRRRRRGRC(Alexa)-amide; K8(Alexa), KKKKKKKKGC(Alexa)-amide;  
 F4K8(Alexa), FFFFGKKKKKKKKGC(Alexa)-amide; PasAPKR8,  
 FFLIGRRRRRRRRGRC(Alexa)-amide; p53C', *KKHRSTSQGKKSKLHSSHARSG*-amide;  
 dR8-p53C', *RRRRRRRRRGKKHRSTSQGKKSKLHSSHARSG*-amide; dPasR8-p53C',  
*FFLIPKGRRRRRRRRRGKKHRSTSQGKKSKLHSSHARSG*-amide; dF4R8-p53C',  
*FFFFGRRRRRRRRRGKKHRSTSQGKKSKLHSSHARSG*-amide; dR12-p53C',  
*RRRRRRRRRRRRRGKKHRSTSQGKKSKLHSSHARSG*-amide; p27<sup>Kip1</sup>C,  
 KKPGLRRRQT-amide; R8-p27<sup>Kip1</sup>C, RRRRRRRRGKKPGLRRRQT-amide;  
 PasR8-p27<sup>Kip1</sup>C, FFLIPKGRRRRRRRRRGKKPGLRRRQT-amid; F4R8-p27<sup>Kip1</sup>C,  
 FFFFGRRRRRRRRRGKKPGLRRRQT-amide; PAD, *KLAKLAKKLAKLAK*-amide; R8-PAD,  
 RRRRRRRRGKKLAKLAKKLAKLAK-amide; PasR8-PAD,  
 FFLIPKGRRRRRRRRRGKKLAKLAKKLAKLAK-amide; F4R8-PAD,  
 FFFFGRRRRRRRRRGKKLAKLAKKLAKLAK-amide. MALDI-TOF MS: R8, 1427.6 [calcd.  
 for (M+H)<sup>+</sup>: 1427.7]; PasR8, 2230.5 [calcd. for (M+H)<sup>+</sup>: 2230.7]; F4R8, 2073.2 [calcd. for  
 (M+H)<sup>+</sup>: 2073.5]; R8(Alexa), 2125.6 [calcd. for (M+H)<sup>+</sup>: 2125.4]; PasR8(Alexa), 2929.5  
 [calcd. for (M+H)<sup>+</sup>: 2928.4]; LILIR8(Alexa), 2635.5 [calcd. for (M+H)<sup>+</sup>: 2635.1];  
 F2R8(Alexa), 2476.9 [calcd. for (M+H)<sup>+</sup>: 2476.8]; F4R8(Alexa), 2771.5 [calcd. for (M+H)<sup>+</sup>:  
 2771.1]; F6R8(Alexa), 3065.9 [calcd. for (M+H)<sup>+</sup>: 3065.5]; K8(Alexa), 1901.2 [calcd. for  
 (M+H)<sup>+</sup>: 1901.3]; F4K8(Alexa), 2547.3 [calcd. for (M+H)<sup>+</sup>: 2547.0]; PasAPKR8, 2703.1  
 [calcd. for (M+H)<sup>+</sup>: 2703.1]; p53C', 2432.0 [calcd. for (M+H)<sup>+</sup>: 2432.8]; dR8-p53C', 3738.8  
 [calcd. for (M+H)<sup>+</sup>: 3739.3]; dPasR8-p53C', 4542.3 [calcd. for (M+H)<sup>+</sup>: 4542.3];  
 dF4R8-p53C', 4384.7 [calcd. for (M+H)<sup>+</sup>: 4385.0]; dR12-p53C', 4364.0 [calcd. for (M+H)<sup>+</sup>:  
 4363.4]; p27<sup>Kip1</sup>C, 1238.9 [calcd. for (M+H)<sup>+</sup>: 1239.5]; R8-p27<sup>Kip1</sup>C, 2603.2 [calcd. for  
 (M+H)<sup>+</sup>: 2603.1]; PasR8-p27<sup>Kip1</sup>C, 3405.7 [calcd. for (M+H)<sup>+</sup>: 3406.1]; F4R8-p27<sup>Kip1</sup>C,  
 3248.3 [calcd. for (M+H)<sup>+</sup>: 3248.8]; PAD, 1524.0 [calcd. for (M+H)<sup>+</sup>: 1524.0]; R8-PAD,  
 2887.7 [calcd. for (M+H)<sup>+</sup>: 2887.6]; PasR8-PAD, 3690.8 [calcd. for (M+H)<sup>+</sup>: 3690.6];  
 F4R8-PAD, 3533.3 [calcd. for (M+H)<sup>+</sup>: 3533.3].

### *Cell culture*

The human cervical cancer-derived HeLa cells were maintained in  $\alpha$ -minimum essential medium with 10% heat-inactivated calf serum [ $\alpha$ -MEM(+)]. A subculture was performed every 3-4 days. The human malignant glioma cell line T98G (expressing the M237I mutant p53)<sup>36</sup> were provided by Health Science Research Resources Bank (Osaka, Japan), and were maintained in Dulbecco's Modified Eagle's Medium with 10% fetal bovine serum [DMEM(+)], 100 U/mL penicillin and 100  $\mu$ g/mL streptomycin. All cell lines were grown on 100-mm dishes and incubated at 37 °C under 5% CO<sub>2</sub> to approximately 70% confluence.

### *Confocal microscopy*

HeLa cells ( $2.0 \times 10^5$ ) were plated on 35-mm glass-bottomed dishes (Iwaki) and cultured in  $\alpha$ -MEM(+) for 48 h. After complete adhesion, the culture medium was exchanged, and the cells were then incubated with 150  $\mu$ L of  $\alpha$ -MEM(+) on a micro chamber (5% CO<sub>2</sub>, 37 °C) attached on the stage of a confocal microscope for 10 min. Then the fluorescently labeled peptides (final concentration, 10  $\mu$ M) were added to the medium and the distribution of peptides was analyzed over time using a confocal laser scanning microscope (CLSM) FV1000 (Olympus) equipped with a 40 $\times$  objective (dry, NA 0.95).

### **Reference**

- [36] Wischhusen, J.; Naumann, U.; Ohgaki, H.; Rastinejad, F.; Weller, M. CP-31398, a novel p53-stabilizing agent, induces p53-dependent and p53-independent glioma cell death. *Oncogene* **2003**, 22, 8233-8245.

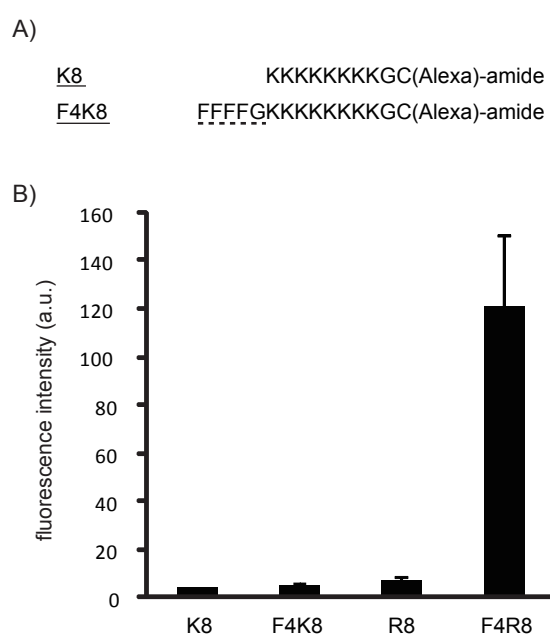

**Figure S1.** (A) Structures of Alexa488-labeled K8 and F4K8. (B) Cellular uptake of K8(Alexa) and F4R8(Alexa) in comparison with the corresponding R8 derivatives analyzed by flow cytometry. Cell line, HeLa; peptides, 1  $\mu$ M; incubation, for 15 min at 37°C in PBS. Means  $\pm$  standard deviation (s.d.) of three experiments are shown.

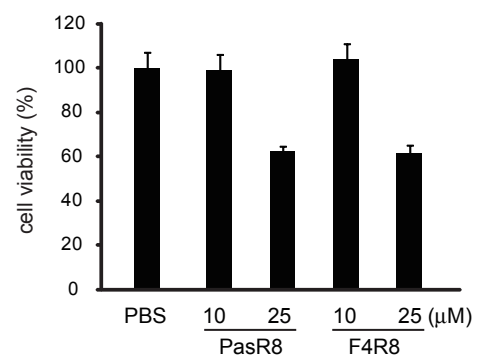

**Figure S2.** Cell viability of HeLa cells treated with PasR8 and F4R8 for 24 h at 37°C in  $\alpha$ -MEM(+). Means  $\pm$  s.d. of three experiments are shown.
